# Supplementary material for: Low intensity pulsed ultrasound for bone healing: systematic review of randomized controlled trials
Source: PubMed Central journal article supplement — BMJ. 2017 Feb 22;356:j656. doi: 10.1136/bmj.j656 (PMC5484179; doi:10.1136/bmj.j656), 2017-02-22
Supplement: schs036958.ww1.pdf [file schs036958.ww1.pdf]

## Appendix 1. Literature search strategies [posted as supplied by author]

### *MEDLINE (Ovid)*

- 1 Fracture Healing/
- 2 Bony Callus/
- 3 bone remod\*.mp.
- 4 exp Fractures, Bone/
- 5 fracture\*.mp.
- 6 exp Orthopedic Procedures/
- 7 or/1-6
- 8 Ultrasonic Therapy/ or Ultrasonic Waves/
- 9 LIPUS.mp.
- 10 8 or 9
- 11 7 and 10

### *EMBASE (Ovid)*

- 1 exp fracture healing/
- 2 callus/
- 3 bone remod\*.mp.
- 4 exp fracture/
- 5 (Fracture\* and (bone\* or osteo\* or verteb\* or bony or extremity)).mp. [mp=title, abstract, heading word, drug trade name, original title, device manufacturer, drug manufacturer, device trade name, keyword, floating subheading]
- 6 exp orthopedic surgery/
- 7 or/1-6
- 8 exp ultrasound therapy/ or ultrasound.mp. or ultrasonic.mp. or LIPUS.mp. [mp=title, abstract, heading word, drug trade name, original title, device manufacturer, drug manufacturer, device trade name, keyword, floating subheading]
- 9 exp echography/
- 10 8 or 9
- 11 7 and 10
- 12 limit 11 to ("therapy (maximizes sensitivity)" or "therapy (maximizes specificity)" or "therapy (best balance of sensitivity and specificity)")

### *CINAHL (Ebsco)*

- # Query
- S12 S11 Limiters - Clinical Queries: Therapy - High Sensitivity, Therapy - High Specificity, Therapy - Best Balance
- S11 S6 AND S10

S10 S8 OR S9  
S9 (MH "Ultrasonic Therapy")  
S8 "LIPUS" or "ultrasound"  
S7 S1 OR S2 OR S3 OR S4 OR S5 OR S6  
S6 (MH "Orthopedic Surgery+")  
S5 "fracture\*"  
S4 bone remod\*  
S3 (MH "Bone Remodeling+")  
S2 (MH "Fracture Healing")  
S1 (MH "Fractures+")

*Cochrane Library (Wiley)*

#1 MeSH descriptor: [Fracture Healing] explode all trees  
#2 MeSH descriptor: [Bony Callus] explode all trees  
#3 MeSH descriptor: [Fractures, Bone] explode all trees  
#4 bone remod\*:ti,ab,kw (Word variations have been searched)  
#5 fracture\*:ti,ab,kw (Word variations have been searched)  
#6 MeSH descriptor: [Orthopedic Procedures] explode all trees  
#7 osteotom\*  
#8 #1 or #2 or #3 or #4 or #5 or #6 or #7  
#9 MeSH descriptor: [Ultrasonic Therapy] explode all trees  
#10 ultrasound:ti,ab,kw (Word variations have been searched)  
#11 or #9 or #10  
#14 #8 and #11 in Trials

*PubMed*

Search (Therapy/Broad[filter]) AND (((fracture) AND ultrasound)) AND (((publisher[sb] OR inprocess[sb] OR pubmednotmedline[sb] OR pubstatusaheadofprint)))

Trials registry search in Clinical Trials.gov service of the U.S. National Institutes of Health and World Health Organization International Clinical Trials Registry Platform Search Portal (Search term: low intensity pulsed ultrasound)
