# Supplementary material for: Low intensity pulsed ultrasound for bone healing: systematic review of randomized controlled trials
Source: PubMed Central journal article supplement — BMJ. 2017 Feb 22;356:j656. doi: 10.1136/bmj.j656 (PMC5484179; doi:10.1136/bmj.j656), 2017-02-22
Supplement: schs036958.ww2.pdf [file schs036958.ww2.pdf]

## **Appendix 2. Other functional outcomes [posted as supplied by author]**

The following functional outcomes were reported in one study comparing LIPUS with sham device: TRUST Investigators writing group, Busse JW, Bhandari M, Einhorn TA, et al. Re-evaluation of low intensity pulsed ultrasound in treatment of tibial fractures (TRUST): randomized clinical trial. *BMJ (Clinical research ed)* 2016;355:i5351.

### **Time to return to work**

Time to event analysis

Hazard ratio 1.11 (95% CI, 0.82 to 1.50) in favour of sham device

### **Time to return to leisure activities**

Time to event analysis

Hazard ratio 1.06 (95% CI, 0.77 to 1.46) in favour of sham device

### **Time to return to $\geq 80\%$ of pre-injury level of function**

Time to event analysis

Hazard ratio 1.00 (95% CI, 0.80 to 1.25)

### **Time to return to full weight bearing**

Time to event analysis

Hazard ratio 0.87 (95% CI, 0.70 to 1.08) in favour of LIPUS

### **Time to return to household activities**

Time to event analysis

Percentage difference -1.9% (95% CI, -11.6% to 8.9%) in favour of LIPUS

The following functional outcomes were reported in two studies: 1) TRUST Investigators writing group, Busse JW, Bhandari M, Einhorn TA, et al. Re-evaluation of low intensity pulsed ultrasound in treatment of tibial fractures (TRUST): randomized clinical trial. *BMJ (Clinical research ed)* 2016;355:i5351, and 2) Lubbert PH, van der Rijt RH, Hoorntje LE, van der Werken C. Low-intensity pulsed ultrasound (LIPUS) in fresh clavicle fractures: a multi-centre double blind randomised controlled trial. *Injury* 2008;39:1444-52.

**Fig A, Forest plot of percent difference for days to return to leisure activities for LIPUS compared with sham device**

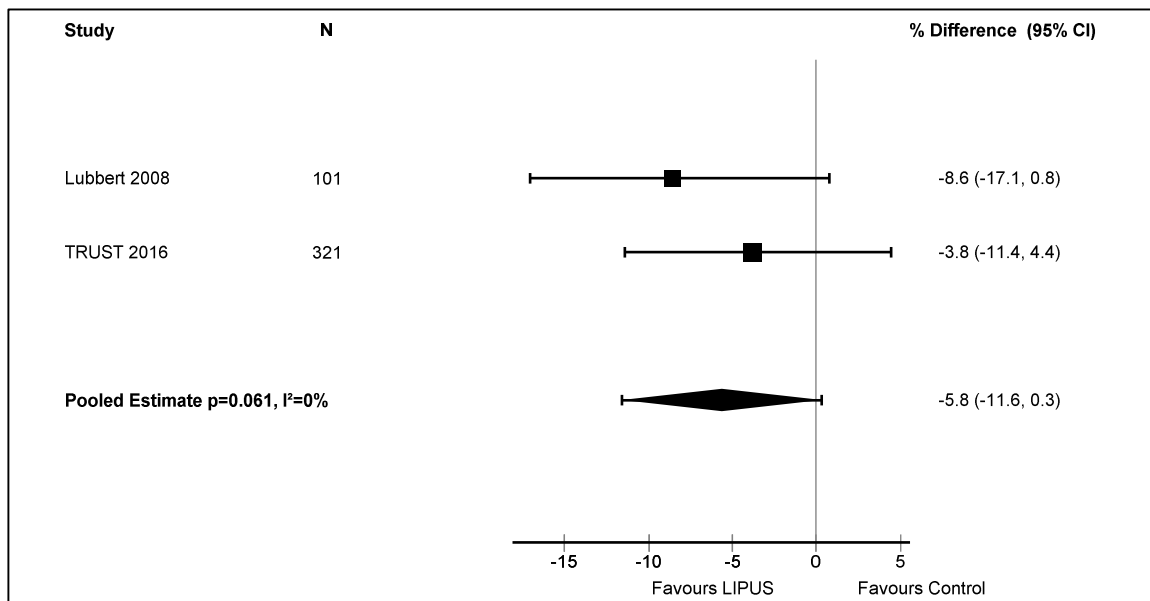

**Fig B, Forest plot of percent difference for days to return to household activities for LIPUS compared with sham device**

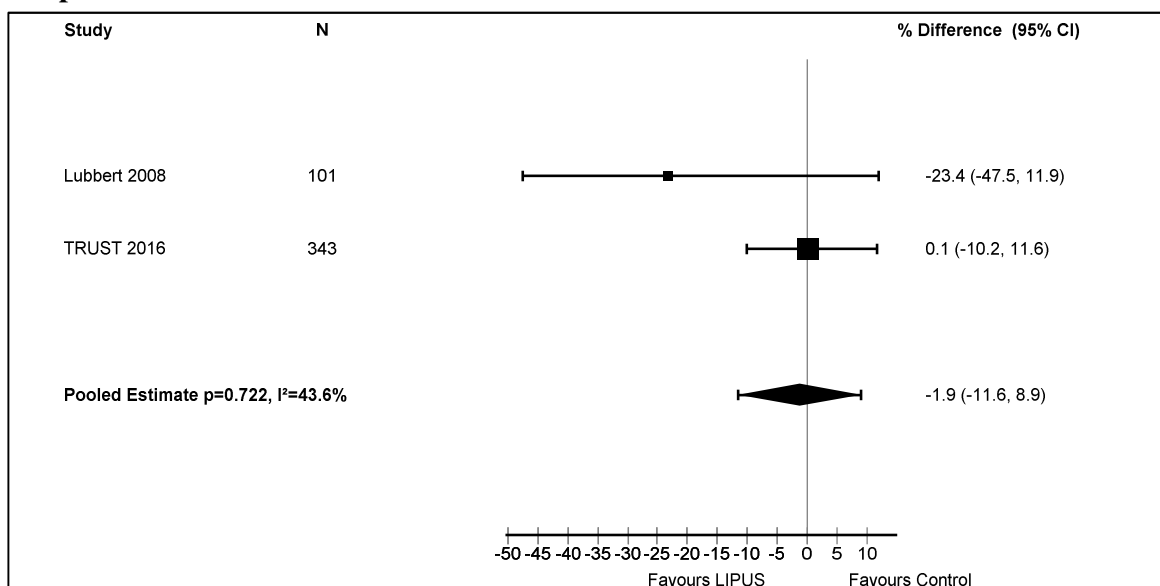

**Multidimensional physical function**, measured by the Short Form 36 physical component summary scores at multiple time points, was reported in two studies: 1) TRUST Investigators writing group, Busse JW, Bhandari M, Einhorn TA, et al. Re-evaluation of low intensity pulsed ultrasound in treatment of tibial fractures (TRUST): randomized clinical trial. *BMJ (Clinical research ed)* 2016;355:i5351., and 2) Busse JW, Bhandari M, Einhorn TA, et al. Trial to re-evaluate ultrasound in the treatment of tibial fractures (TRUST): a multicenter randomized pilot study. *Trials* 2014;15:206.

**Fig C, Busse et al. (2016): Short Form 36 Physical Component Scores over time for LIPUS compared with sham device. A repeated measurement analysis found no significant interaction with time ( $p=0.30$ )**

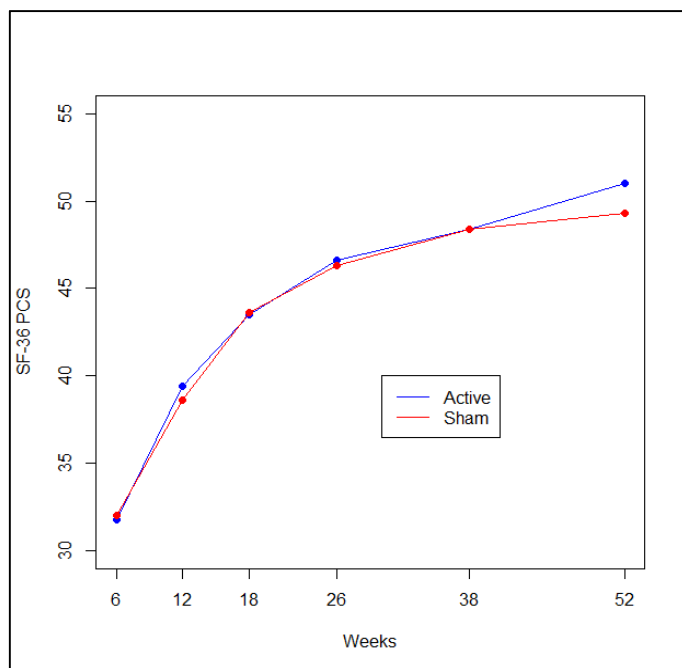

N ranging from 475 at 6 weeks to 301 at 52 weeks

**Fig D, Busse et al. (2014), unpublished material: Short Form 36 Physical Component Scores over time for LIPUS compared with sham device**

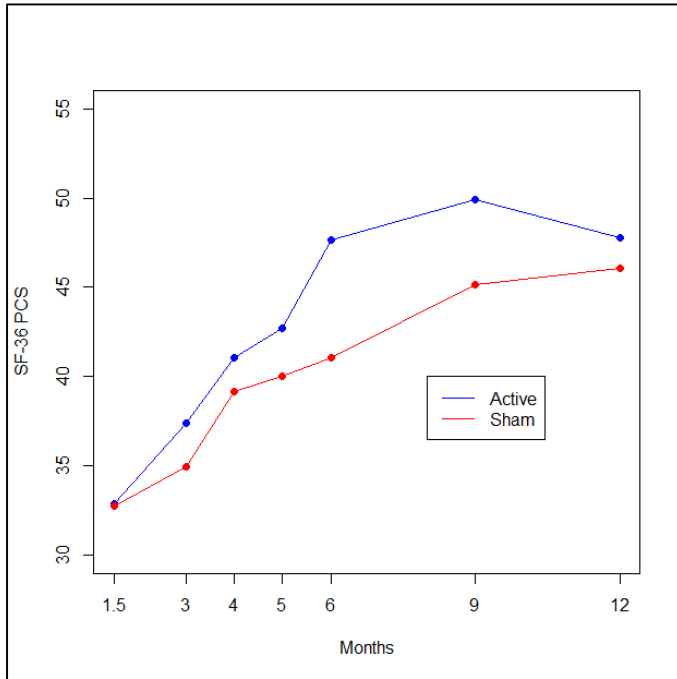

N ranging from 50 at 6 weeks to 43 at 1 year.
