# Supplementary material for: Low intensity pulsed ultrasound for bone healing: systematic review of randomized controlled trials
Source: PubMed Central journal article supplement — BMJ. 2017 Feb 22;356:j656. doi: 10.1136/bmj.j656 (PMC5484179; doi:10.1136/bmj.j656), 2017-02-22

**Appendix 3. Additional analyses [posted as supplied by author]**

**Fig A, Sensitivity analysis: Forest plot for LIPUS compared with control (sham device or no device) for pain, by risk of bias considering 10% (instead of 20%) attrition or more representing high risk of bias. Interaction p=0.35**

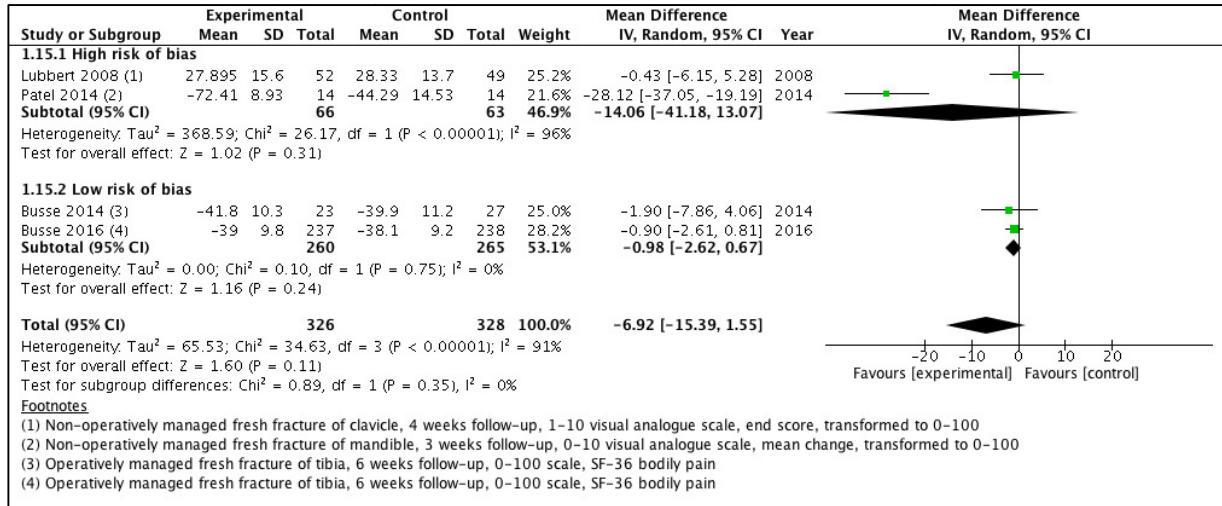

**Fig B, Sensitivity analysis: Forest plot for percent difference for LIPUS compared with control (sham device or no device) for days to radiographic healing, by risk of bias considering 10% (instead of 20%) attrition or more representing high risk of bias. Interaction p=0.004**

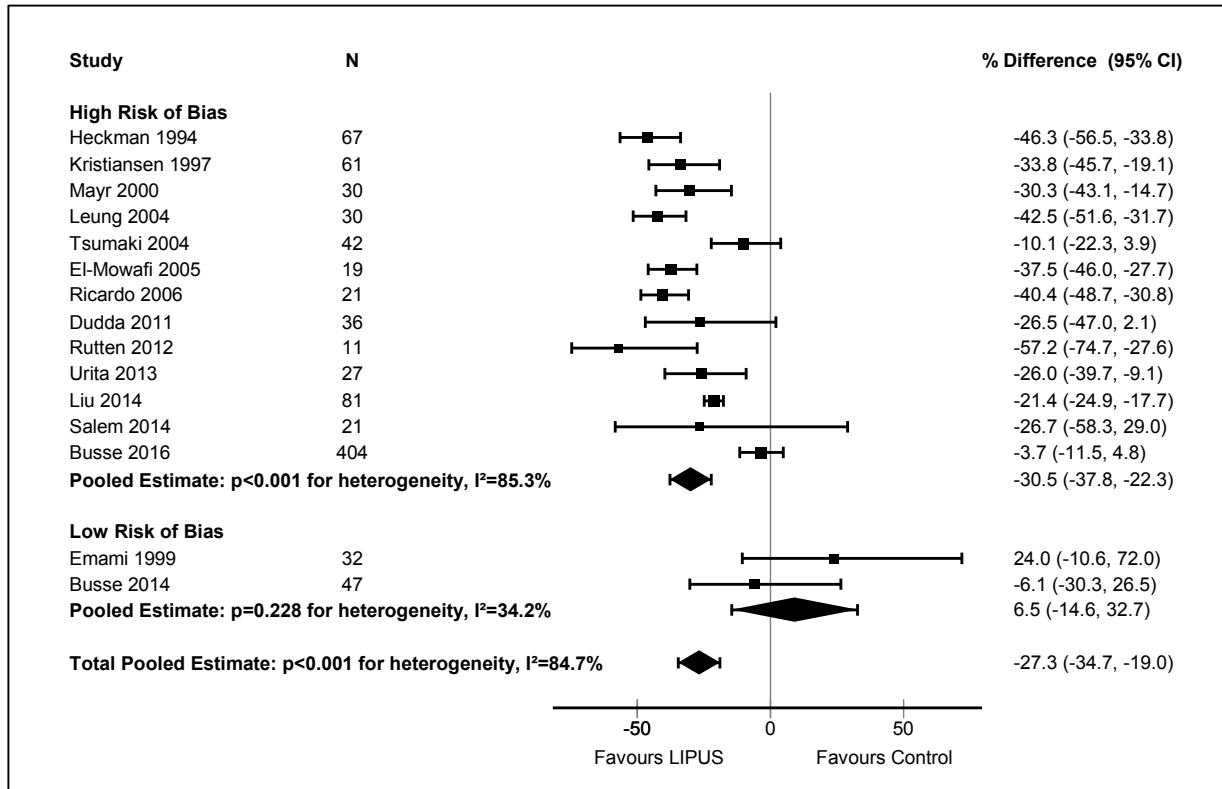

**Fig C, Forest plot for percent difference for LIPUS compared with control (sham device or no device) for days to radiographic healing, by clinical subgroups. Interaction p=0.13**

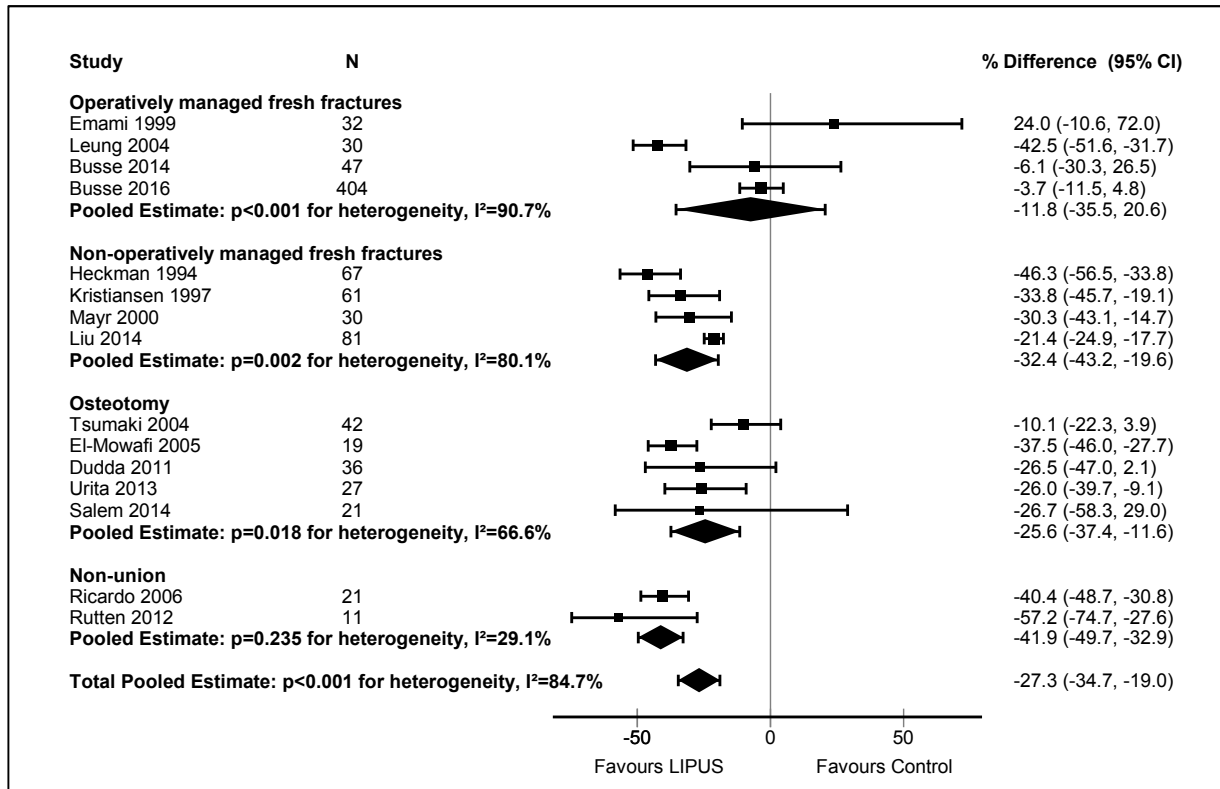

**Fig D, Forest plot for percent difference for LIPUS compared with control (sham device or no device) for days to radiographic healing, by compliance. Interaction p=0.99**

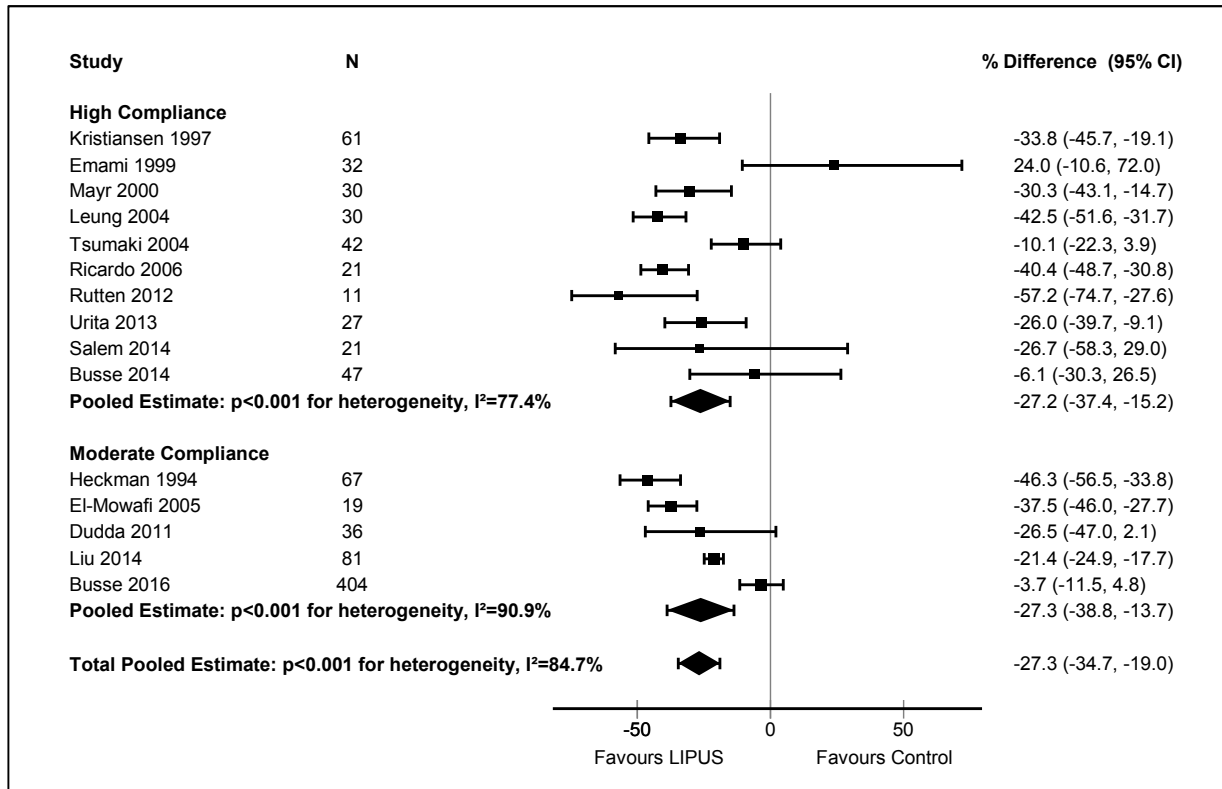

**Fig E, Funnel plot for days to radiographic healing. Egger's linear regression test for asymmetry of the funnel plot:  $p=0.251$**

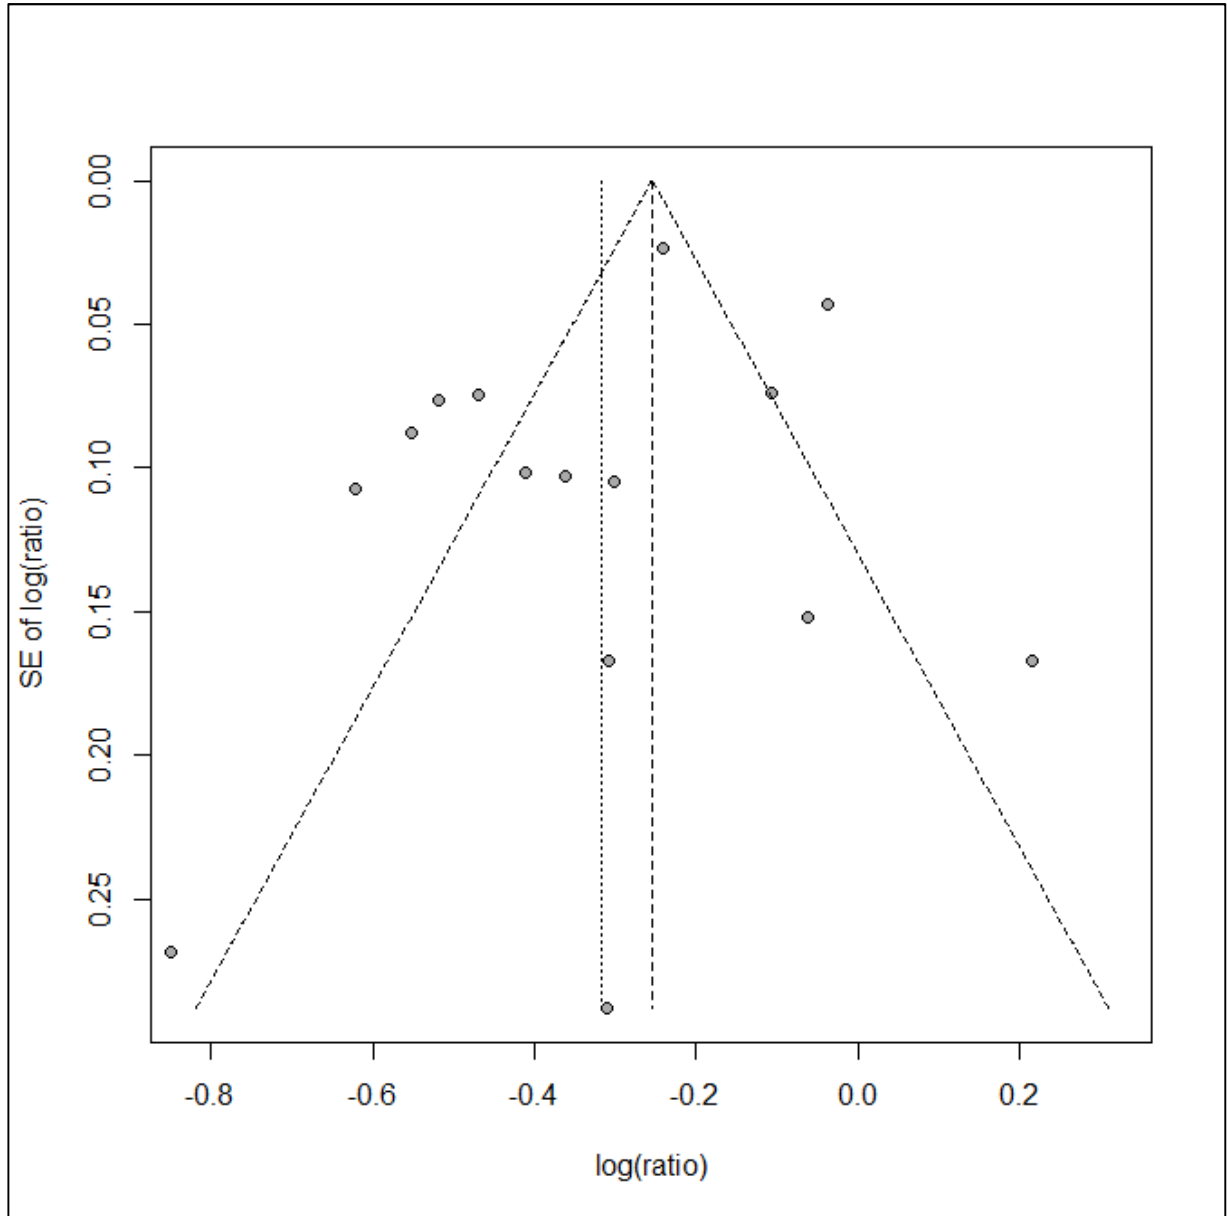

Supplement: schs036958.ww3.pdf [file schs036958.ww3.pdf]
